# Supplementary material for: Phylogeny and Historical Biogeography of Veronica Subgenus Pentasepalae (Plantaginaceae): Evidence for Its Origin and Subsequent Dispersal
Source: MDPI journal article supplement (doi:10.3390/biology11050639), 2022-04-21
Supplement: s1 [file s1]

Table S1. Details of specimens of *Veronica* included in this study, including locality, herbarium information and GenBank accession numbers.

| No. | Taxon name                                        | Locality                                                           | Herbarium (Voucher) | Collector                   | ITS GenBank |
|-----|---------------------------------------------------|--------------------------------------------------------------------|---------------------|-----------------------------|-------------|
| 1   | <i>V. acrotheca</i> 1                             | Iran: Lorestan, SE of Dorud, lake Gahar                            | <i>MIR</i> 3975     | M. Mirtadzadini et al.      | ON202639    |
| 2   | <i>V. acrotheca</i> 2                             | Iran: Azarbaijan, Arasbaran, Ilan-khosh                            | <i>TUH</i> 35457    | A. Ghahreman et al.         | ON202640    |
| 3   | <i>V. antalyensis</i>                             | Turkey: Antalya, Qazipasa, Cimbiti Yaylas                          | <i>E</i> 00326080   | H. Sumbul                   | ON202641    |
| 4   | <i>V. aragonensis</i> 1                           | Spain: Huesca, collado de Ceresa, Peña Montañesa                   | <i>SALA</i> 121537  | A. Abad de Blas et al.      | KT361667    |
| 5   | <i>V. aragonensis</i> 2                           | Spain: Granada, Huéscar, Sierra de la Sagra                        | <i>SALA</i> 93528   | J. A. Sanchez-Agudo et al.  | KT361668    |
| 6   | <i>V. aragonensis</i> 3                           | Spain: Huesca, Turbón massif, between the Turbonet and Aligas peak | <i>SALA</i> 121536  | M. M. Martinez-Ortega       | AY741517    |
| 7   | <i>V. armena</i> 1                                | Turkey: Erzurum, Mt. Palandöken                                    | <i>MA</i> 687629    | A. Herrero et al.           | KT361709    |
| 8   | <i>V. armena</i> 2                                | Cult. NYBG                                                         | <i>WU</i> 1404      | Struwe                      | AF313040    |
| 9   | <i>V. aucheri</i> 1                               | Iran, Central Alborz                                               |                     | 399                         | ON202642    |
| 10  | <i>V. aucheri</i> 2                               | Iran: Mazandaran, Mt. Damavand                                     | <i>MIR</i> 3622     | M. Doostmohammadi           | ON202643    |
| 11  | <i>V. austriaca</i> subsp. <i>jacquinii</i> 1     | Botanischer Garten Bonn, cultivated                                | <i>BONN</i>         | D. C. Albach                | AF313000    |
| 12  | <i>V. austriaca</i> subsp. <i>jacquinii</i> 2     | Montenegro: Treskavac Mts. between Borkovici and Boricje           | <i>SALA</i> 149369  | B. M. Rojas-Andres et al.   | KT361675    |
| 13  | <i>V. austriaca</i> subsp. <i>jacquinii</i> 3     | Bulgaria: Stara Zagora, Nova Mahala, near Nikolaev                 | <i>SALA</i> 149377  | B. M. Rojas-Andres et al.   | KT361676    |
| 14  | <i>V. austriaca</i> subsp. <i>jacquinii</i> 4     | Croatia: Josipdol, between Oštarije and Ribarić'i                  | <i>SALA</i> 149042  | B. M. Rojas-Andres et al.   | KJ630596    |
| 15  | <i>V. austriaca</i> subsp. <i>jacquinii</i> 5     | Bosnia: Travnik, Vlašić                                            | <i>SALA</i> 149389  | B. M. Rojas-Andres et al.   | KT361677    |
| 16  | <i>V. austriaca</i> subsp. <i>dentata</i> 1       | Austria: Krems, between Weissenkirchen and Dürnstein               | <i>SALA</i> 149043  | B. M. Rojas-Andres et al.   | KJ630593    |
| 17  | <i>V. austriaca</i> subsp. <i>dentata</i> 2       | Austria: Wien, Kalksburg                                           | <i>SALA</i> 149383  | B. M. Rojas-Andres et al.   | KT361671    |
| 18  | <i>V. baranetskii</i>                             |                                                                    | -                   | -                           | ON202644    |
| 19  | <i>V. bogosensis</i>                              | Russia: North Ossetia, Ingushetia and Chechnya                     | <i>MO</i>           | Prima                       | AF486359    |
| 20  | <i>V. bombycina</i> subsp. <i>bolcardaghensis</i> | NYBG, cultivated                                                   | <i>WU</i> 1406      | Struwe                      | AF486358    |
| 21  | <i>V. bombycina</i> subsp. <i>bombycina</i>       | NYBG, cultivated                                                   | <i>WU</i> 1403      | Struwe                      | AF486353    |
| 22  | <i>V. bombycina</i> subsp. <i>froediniana</i>     | Turkey: Pelli Dagı, south of Kuzgunkiran pass.                     | <i>WU</i> 0027040   | D. C. Albach and F. Ozgokce | KT361710    |
| 23  | <i>V. caespitosa</i> 1                            | Turkey: Kastamonu, Ilgaz Dagları, 35 km south of Kastamonu         | <i>E</i> 01005965   | J. R. Edmondson             | ON202645    |
| 24  | <i>V. caespitosa</i> 2                            | Turkey: Ulu Dag near Bursa                                         | <i>E</i> 01005968   | J. J. F. E. De Wilde        | ON202646    |

|    |                                                  |                                                       |                    |                                          |          |
|----|--------------------------------------------------|-------------------------------------------------------|--------------------|------------------------------------------|----------|
| 25 | <i>V. caucasica</i> 1                            | Georgia: Kazbegi                                      | <i>WU</i> 326      | D. C. Albach                             | AF486357 |
| 26 | <i>V. caucasica</i> 2                            | Cultivated                                            | 57                 |                                          | ON202647 |
| 27 | <i>V. chionantha</i>                             | Iran: Alborz, 2 km east of Azadbar to Gachsar         | <i>MIR</i> 3616    | M. Doostmohammadi                        | ON202648 |
| 28 | <i>V. cinerea</i>                                | RBG Kew, cultivated                                   | <i>K</i> 113       | D. C. Albach and M. Chase                | AY144458 |
| 29 | <i>V. crinita</i> 1                              | Bulgaria: Varna, between Vinitsa and Aldza monastery  | <i>SALA</i> 149037 | B. M. Rojas-Andres et al.                | KJ630594 |
| 30 | <i>V. crinita</i> 2                              | Bosnia: Ravan Planina, Mt. Tajan                      | <i>SALA</i> 149244 | B. Frajman                               | KT361669 |
| 31 | <i>V. crinita</i> 3                              | Bulgaria: Plodiv, near Popovitsa                      | <i>SALA</i> 149038 | B. M. Rojas-Andres et al.                | KT361670 |
| 32 | <i>V. cuneifolia</i> 1<br><i>subsp. isaurica</i> | NYBG, cultivated                                      | <i>WU</i> 1409     | Struwe                                   | AF486354 |
| 33 | <i>V. cuneifolia</i> 2                           | Turkey: Antalya, Akseki, west of Taslica              | 1148               | Abdel                                    | ON202649 |
| 34 | <i>V. cuneifolia</i> 3                           | Turkey: Mt. Tahtali                                   | <i>OLD</i> 1159    | D. C. Albach                             | ON202650 |
| 35 | <i>V. czerniakows</i> 1                          | Iran: Khorassan: Kopet-Dagh                           | <i>IRAN</i> 39177  | F. Terme                                 | AF486362 |
| 36 | <i>V. czerniakows</i> 2                          | Iran: Khorassan, north of Shirvan, Golul Sarani P. A. | <i>MIR</i> 3629    | M. Doostmohammadi and A. Talebi          | ON202651 |
| 37 | <i>V. dalmatica</i> 1                            | Croatia: Dubrovnik, Gromac̑a                          | <i>SALA</i> 149039 | B. M. Rojas-Andres et al.                | KJ630595 |
| 38 | <i>V. dalmatica</i> 2                            | Montenegro: Žabljak                                   | <i>SALA</i> 149287 | B. M. Rojas-Andres et al.                | KT361674 |
| 39 | <i>V. daranica</i> 1                             | Iran: Esfahan, Boein, 6 km north of Hosseinabad       | <i>MIR</i> 3546    | M. Doostmohammadi                        | ON202652 |
| 40 | <i>V. daranica</i> 2                             | Iran: Bakhtiari, SW of Samsami, Mt. Mili              | <i>MIR</i> 3970    | M. Mirtadzadini                          | ON202653 |
| 41 | <i>V. dichrus</i>                                | NYBG, cultivated                                      | <i>WU</i> 1407     | Struwe                                   | AF312998 |
| 42 | <i>V. elmaliensis</i>                            | Turkey: Lydia: Mt. Sipyli                             | <i>E</i> 01005953  | J. Bornmuller                            | ON202654 |
| 43 | <i>V. farinosa</i>                               | Iran: Esfahan, Semirom, Surmandeh Mt.                 | <i>TUR</i> 213948  | Alava                                    | AY741518 |
| 44 | <i>V. fragilis</i> 1                             | Iran: Chaharmahal, Sartange-Mahmoud                   | <i>MIR</i> 3544    | M. Doostmohammadi                        | ON202655 |
| 45 | <i>V. fragilis</i> 2                             | Iran: Zagros Mountain                                 |                    | 358                                      | ON202656 |
| 46 | <i>V. fridericae</i> 1                           | Turkey: Van, north of Gedikbasi                       |                    | 610                                      | ON202657 |
| 47 | <i>V. fridericae</i> 2                           | Turkey: Van, between Baskale and Güzelsu              | <i>E</i> 00326073  | Sorger and Buchner                       | ON202658 |
| 48 | <i>V. fuhsii</i>                                 | Turkey                                                |                    | 863                                      | ON202659 |
| 49 | <i>V. gaubae</i> 1                               | Iran: Semnan, Mt. Neyzeva                             | <i>MIR</i> 3625    | M. Doostmohammadi                        | ON202660 |
| 50 | <i>V. gaubae</i> 2                               | Iran: Mazandaran, Alasht, Mt. Eltamer                 | <i>MIR</i> 3631    | M. Doostmohammadi and A. Ghorbanalizadeh | ON202661 |
| 51 | <i>V. khorassanica</i> 1                         | Iran: Semnan, Shahrud, NW of Mojen waterfall          | <i>MIR</i> 3976    | M. Mirtadzadini                          | ON202662 |
| 52 | <i>V. khorassanica</i> 2                         | Iran: Khorassan, Ghorkhod, west of Bash-Kalate        | <i>FUMH</i> 45195  | M. Joharch and F. Memeriani              | ON202663 |
| 53 | <i>V. kindlii</i>                                | North Macedonia: Gevgelija, Mt. Kozuf                 | <i>SALA</i> 149278 | B. M. Rojas-Andres et al.                | KT361689 |
| 54 | <i>V. kopetdaghensis</i>                         | Iran: Khorasan, NW of Mashhad, Hezar-Masjed peak      | <i>FUMH</i> 44208  | M. Joharchi and M. Behroozian            | ON202664 |

|    |                                                    |                                                           |                    |                                          |          |
|----|----------------------------------------------------|-----------------------------------------------------------|--------------------|------------------------------------------|----------|
| 55 | <i>V. krylovii</i> 1                               | Russia: Rep. Altai, Ulaganskii ,vicin. of lake Choibekkel | <i>ALTB</i>        | A. I. Schmakov et al.                    | KT361681 |
| 56 | <i>V. krylovii</i> 2                               | Kazakhstan: Ridge Tarbagataj                              | <i>ALTB</i>        | S. Smirnov et al.                        | KT361682 |
| 57 | <i>V. kurdica</i> subsp. <i>filicaulis</i> 1       | Iran: Bakhtiari, SW of Samsami, Mt. Mili                  | <i>MIR 3969</i>    | M. Mirtadzadini                          | ON202665 |
| 58 | <i>V. kurdica</i> subsp. <i>filicaulis</i> 2       | Iran: Kerman, western slopes of Mt. Palvar                | <i>MIR 3596</i>    | M. Doostmohammadi                        | ON202666 |
| 59 | <i>V. kurdica</i> subsp. <i>kurdica</i> 1          | Iran: Mazandaran, south of Kelardasht                     |                    | 1740                                     | ON202667 |
| 60 | <i>V. kurdica</i> subsp. <i>kurdica</i> 2          | Iran: Ghazvin, west of Abegarm, Kise-jin to Dashtak       | <i>MIR 3547</i>    | M. Doostmohammadi                        | ON202668 |
| 61 | <i>V. kurdica</i> subsp. <i>kurdica</i> 3          | Iran: east of Damavand, around lake Tar                   | <i>MIR 3971</i>    | M. Mirtadzadini                          | ON202669 |
| 62 | <i>V. kurdica</i> subsp. <i>kurdica</i> 4          | Iran: Firuzkuh to Polur, between Najafdar and Laasem      | <i>MIR 3978</i>    | M. Mirtadzadini                          | ON202670 |
| 63 | <i>V. leiocarpa</i>                                | Jordan: between Al-Rishah and Rahma                       | <i>OLD1310</i>     | D. C. Albach                             | KJ630597 |
| 64 | <i>V. liwannensis</i>                              | NYBG, cultivated                                          | <i>WU 1411</i>     | Struwe                                   | AF312997 |
| 65 | <i>V. macrostachya</i> 2 (subsp. <i>sorgerae</i> ) | Turkey: Icel, Silifke-Gulnar, 17 km south of Silifke      | <i>E 00074752</i>  | M. Nydegger                              | ON202671 |
| 66 | <i>V. mazanderanae</i> 1                           | Iran: Gilan, Javaherdasht                                 |                    | 1741                                     | ON202672 |
| 67 | <i>V. mazanderanae</i> 2                           | Iran: Mazandaran, between Firukuh and Qaemshahr, Gaduk    | <i>MIR 3655</i>    | <i>M. Mirtadzadini</i>                   | ON202673 |
| 68 | <i>V. microcarpa</i> 1                             | Azerbaijan, Sadarak                                       |                    | 873                                      | ON202674 |
| 69 | <i>V. microcarpa</i> 2                             | Turkey: Hakkari, near Bagisli                             |                    | 2606                                     | ON202675 |
| 70 | <i>V. microcarpa</i> 3                             | Iran: Azarbaijan, Khoy to Qotur                           | <i>TUH 34576</i>   | American-Iranian Botanical Deligation    | ON202676 |
| 71 | <i>V. minuta</i>                                   |                                                           |                    | 799                                      | ON202677 |
| 72 | <i>V. mirabilis</i>                                | Iran, Mazandaran, Alasht, Mt. Eltamer                     | <i>MIR 3632</i>    | M. Doostmohammadi and A. Ghorbanalizadeh | ON202678 |
| 73 | <i>V. multifida</i> 1                              | Turkey: prov. Antalya, Taurus                             | <i>OLD 1143</i>    | D. C. Albach                             | KT361711 |
| 74 | <i>V. multifida</i> 2                              | Turkey: Erzurum, Uzundere                                 | -                  | -                                        | DQ534899 |
| 75 | <i>V. multifida</i> 3                              | Turkey: Erzurum, Uzunkavak, south of Serdarli             |                    | 2603                                     | ON202679 |
| 76 | <i>V. multifida</i> 4                              | Iran: Ardebil, SE of Khalkhal                             | <i>MIR 3610</i>    | M. Doostmohammadi                        | ON202680 |
| 77 | <i>V. multifida</i> 5                              | Iran: Mazandaran, Ramsar, before Garasmasar               | <i>MIR 3613</i>    | M. Doostmohammadi and A. Ghorbanalizadeh | ON202681 |
| 78 | <i>V. oltensis</i>                                 | NYBG, cultivated                                          | <i>WU 1405</i>     | Struwe                                   | AF312995 |
| 79 | <i>V. orbiculata</i> 1                             | Croatia: Peljesak, between Trstenik and Pijavice          | <i>SALA 149294</i> | B. M. Rojas-Andres et al.                | KT361683 |
| 80 | <i>V. orbiculata</i> 2                             | Croatia: between Omis and Makarska, Brela                 | <i>SALA 149337</i> | B. M. Rojas-Andres et al.                | KT361684 |
| 81 | <i>V. robiculata</i> 3                             | Bosnia: Mostar, Mt. Hum                                   | <i>SALA 149336</i> | B. M. Rojas-Andres et al.                | KT361685 |
| 82 | <i>V. orbiculata</i> 4                             | Bosnia: Mostar, Mt. Hum                                   | <i>SALA 149336</i> | B. M. Rojas-Andres et al.                | KT361686 |

|     |                          |                                                    |             |                                          |          |
|-----|--------------------------|----------------------------------------------------|-------------|------------------------------------------|----------|
| 83  | <i>V. orientalis</i> 1   | Turkey: Van, Karabel pass                          | WU 701      | D. C. Albach                             | AY741515 |
| 84  | <i>V. orientalis</i> 2   | Iran: Esfahan, NW of Semirom to Vanak              | MIR 4006    | M. Mirtadzhadini                         | ON202682 |
| 85  | <i>V. orientalis</i> 3   | Turkey: Van, Gevas                                 | OLD         | 1738                                     | ON202683 |
| 86  | <i>V. orientalis</i> 4   | Turkey: Van, north of Muradiye                     | OLD         | 2607                                     | ON202684 |
| 87  | <i>V. orientalis</i> 5   | Turkey: Van, north of Ozalp, near Yukaribalcikli   | OLD         | 2605                                     | ON202685 |
| 88  | <i>V. orientalis</i> 6   | Lebanon: Nabatiyeh, Baraachit                      | OLD         | 1315                                     | ON202686 |
| 89  | <i>V. orientalis</i> 7   | Turkey: Adiyaman, Kahta, Camlica                   | OLD         | 1302                                     | ON202687 |
| 90  | <i>V. orientalis</i> 8   | Georgia: north of Vardisubani, Sheertebe           | OLD         | 2608                                     | ON202688 |
| 91  | <i>V. orientalis</i> 9   | Iran: Fars, between Dashte-Arjan and Khaneh-Zenian | MIR 3989    | M. Mirtadzhadini and R. Naderi           | ON202689 |
| 92  | <i>V. orientalis</i> 10  | Iran, Hamedan, Avaj                                | TUH 16922   | F. Attar and F. Dadjou                   | JF409918 |
| 93  | <i>V. orientalis</i> 11  | Turkey: Van, south of Guzelsu, Murataldi           | OLD         | 2604                                     | ON202690 |
| 94  | <i>V. orsiniana</i> 1    | Italy: Abruzzo, La Majella                         | SALA 149297 | E. Rico et al.                           | KT361687 |
| 95  | <i>V. orsiniana</i> 2    | Italy: Abruzzo, La Majella                         | SALA 149298 | E. Rico et al.                           | KT361688 |
| 96  | <i>V. paederotae</i> 1   | Iran: Mazandaran, Mt. Alam-kuh                     | MIR 3636    | M. Doostmohammadi and A. Ghorbanalizadeh | ON202691 |
| 97  | <i>V. paederotae</i> 2   | Iran: Mazandaran, Mt. Azad kuh                     | WU 7901     | Klein                                    | AF509783 |
| 98  | <i>V. parsana</i>        | Iran: Ardebil, east of Abibeiglu, Asbine mt.       | MIR 3608    | M. Doostmohammadi                        | ON202692 |
| 99  | <i>V. pectinata</i> 1    | Turkey: Bolu, south of Abant Golu                  | MA 688478   | C. Aedo et al.                           | KT361712 |
| 100 | <i>V. pectinata</i> 2    | NYBG, cultivated                                   | WU 1410     | Struwe                                   | AY144460 |
| 101 | <i>V. peduncularis</i> 1 | Georgia: Mtskheta, monastery Sedaseni              | SALA 110319 | M. M. Martinez-Ortega and al             | KT361714 |
| 102 | <i>V. peduncularis</i> 2 | Georgia: Kazbegi                                   | WU 325      | D. C. Albach                             | AF486356 |
| 103 | <i>V. polifolia</i> 1    | Jordan: Aqaba, north of Al-Rishah                  | OLD1309     | D. C. Albach                             | KJ630601 |
| 104 | <i>V. polifolia</i> 2    | Lebanon: Nabatiyeh, Baraashit                      |             | 1316                                     | ON202693 |
| 105 | <i>V. polium</i> 1       | Turkey: Pelli Dag, south of Kuzgunkiran pass.      | WU 0025732  | D. C. Albach and F. Ozgokce              | KT361713 |
| 106 | <i>V. polium</i> 2       | Turkey: Bitlis: Pelli Dag                          | E 01016482  | P. H. Davis                              | ON202694 |
| 107 | <i>V. prostrata</i> 1    | Austria: Rohrendorf bei Krems, Saubühel            | SALA 149040 | B. M. Rojas-Andres et al.                | KJ630602 |
| 108 | <i>V. prostrata</i> 2    | Switzerland: Valais, Charrat                       | SALA 149312 | B. M. Rojas-Andres et al.                | KT361690 |
| 119 | <i>V. prostrate</i> 3    | Bulgaria: Shumen, Madara                           | SALA 149317 | B. M. Rojas-Andres et al.                | KT361691 |
| 110 | <i>V. rhodopea</i> 1     | Bulgaria: Pazardzhik, Belmeken, near the           | SALA 149321 | B. M. Rojas-Andres et al.                | KT361692 |
| 111 | <i>V. rhodopea</i> 2     | Bulgaria: Mt. Rila                                 | SOM         | Bondev                                   | AY144459 |

|     |                                                                                |                                                                             |                       |                                              |          |
|-----|--------------------------------------------------------------------------------|-----------------------------------------------------------------------------|-----------------------|----------------------------------------------|----------|
| 112 | <i>V. rosea</i> 1                                                              | Morocco: Ifrane, Azrou, Djebel Hebri                                        | <i>SALA</i><br>149323 | D. Pinto-Carrasco et al.                     | KT361693 |
| 113 | <i>V. rosea</i> 2                                                              | Algeria: Tlemcen, Col de Krorchef                                           | <i>SALA</i><br>149324 | A. Juan-Galladro et al.                      | KT361694 |
| 114 | <i>V. rosea</i> 3                                                              | Morocco: Midelt, Great Atlas, Cirque de Jaffar                              | <i>SALA</i><br>121638 | L. Delgado-Sanches et al.                    | AY741519 |
| 115 | <i>V. satureiifolia</i> 1                                                      | France: Dep. Lozère, Aven Armand                                            | <i>SALA</i><br>149356 | B. M. Rojas-Andres et al.                    | KT361695 |
| 116 | <i>V. satureiifolia</i> 2                                                      | Spain: Huesca, Ansó, Linza, Paso del'Onso                                   | <i>SALA</i><br>124593 | L. Delgado-Sanches and M. M. Martinez-Ortega | KT361696 |
| 117 | <i>V. satureiifolia</i> 3                                                      | Germany: Baden Württemberg, Bopfingen, Rohrbachmühle                        | <i>SALA</i><br>124594 | M. M. Martinez-Ortega                        | KT361697 |
| 118 | <i>V. schizostegia</i> = <i>V. macrostachya</i> l ( <i>ssp. schizostegia</i> ) | Iran: Kordestan, Auraman valley                                             | <i>MIR</i> 3568       | M. Mirtadzadini and F. Attar                 | ON202695 |
| 119 | <i>V. sennenii</i> 1                                                           | Spain: Álava, Salinas de Añana, way up to the collado de la Rastrilla       | <i>SALA</i><br>149394 | B. M. Rojas-Andres et al.                    | KT361698 |
| 120 | <i>V. sennenii</i> 2                                                           | Spain: Cantabria, Sonabia                                                   | <i>SALA</i><br>149395 | B. M. Rojas-Andres et al.                    | KT361699 |
| 121 | <i>V. taurica</i>                                                              | Ukrain: Alushta: north side of Roman Kosh.                                  | <i>E</i><br>01005980  | Davis                                        | ON202696 |
| 122 | <i>V. tauricola</i> 1                                                          | Turkey: Nigde, Ala Dag                                                      | <i>E</i><br>01005973  | P. W. Wood and W. B. Gibson                  | ON202697 |
| 123 | <i>V. tauricola</i> 2                                                          | Turkey: Sivas, east flank of Tahtali Dag                                    | <i>E</i><br>01005974  | J. M. Watson                                 | ON202698 |
| 124 | <i>V. tenuifolia</i> subsp. <i>fontqueri</i> 1                                 | Spain: Málaga, Sierra de las Nieves, Puerto de los Pilonos                  | <i>MGC</i><br>46659   | F. J. Hernandez-Garcia et al.                | KT361672 |
| 125 | <i>V. tenuifolia</i> subsp. <i>fontqueri</i> 2                                 | Spain: Almería, Sierra de Gádor, Llanos de Boliches                         | <i>SALA</i><br>95041  | F. J. Hernandez-Garcia et al.                | KT361673 |
| 126 | <i>V. tenuifolia</i> subsp. <i>javalambrensis</i> 1                            | Spain: Salamanca, La Mata de la Armuña                                      | <i>SALA</i><br>149328 | B. M. Rojas-Andres and N. Lopez-Gonzalez     | KT361679 |
| 127 | <i>V. tenuifolia</i> subsp. <i>javalambrensis</i> 2                            | Spain: Valdelinares, El Hornillo                                            | <i>SALA</i><br>110650 | E. Rico and X. Giraldez                      | KT361680 |
| 128 | <i>V. tenuifolia</i> subsp. <i>tenuifolia</i> 1                                | Spain: Navarra, Cáseda, at intersection of road NA534 and Canal de Bárdenas | <i>SALA</i><br>95040  | L. Delgado-Sanches and M. M. Martinez-Ortega | KT361700 |
| 129 | <i>V. tenuifolia</i> subsp. <i>tenuifolia</i> 2                                | Spain: Huesca, Arro, near the road to Los Molinos                           | <i>SALA</i><br>93496  | L. Delgado-Sanches and M. M. Martinez-Ortega | KT361701 |
| 130 | <i>V. tenuifolia</i> subsp. <i>tenuifolia</i> 3                                | Spain: Huesca, Arro.                                                        | <i>SALA</i><br>93496  | M. M. Martinez-Ortega                        | AY741516 |
| 131 | <i>V. teucrioides</i> 1                                                        | Greece: Kozani, Mt. Siniátsikon, over Námata                                | <i>SALA</i><br>149270 | A. Herrero et al.                            | KT361702 |
| 132 | <i>V. teucrioides</i> 2                                                        | Greece: Mt. Olympus                                                         | <i>SALA</i><br>149330 | B. M. Rojas-Andres et al.                    | KT361703 |
| 133 | <i>V. teucrium</i> var. <i>teucrium</i> 1                                      | Bulgaria: 3 km east of Tran, road to Pernik                                 | <i>SALA</i><br>149044 | B. M. Rojas-Andres et al.                    | KJ630603 |
| 134 | <i>V. teucrium</i> var. <i>teucrium</i> 2                                      | Germany: Nordrhein-Westfalen, Euskirchen, between Iversheim and Arloff      | <i>SALA</i><br>149414 | A. Abad de Blas et al.                       | KT361704 |

|                  |                                                  |                                                                                   |                              |                                   |          |
|------------------|--------------------------------------------------|-----------------------------------------------------------------------------------|------------------------------|-----------------------------------|----------|
| 135              | <i>V. teucrium</i> var.<br><i>angustifolia</i> 1 | France: Dep. Haute-Savoie,<br>Mt. Salève                                          | <i>SALA</i><br><i>149399</i> | B. M. Rojas-Andres et<br>al.      | KT361705 |
| 136              | <i>V. teucrium</i> var.<br><i>angustifolia</i> 2 | France: Dep. Eure et Loir,<br>Châteaudun, Thiville                                | <i>SALA</i><br><i>149413</i> | A. Abad de Blas et al.            | KT361706 |
| 137              | <i>V. thymoides</i>                              | Cultivated                                                                        |                              | 203                               | ON202699 |
| 138              | <i>V. turrilliana</i> 1                          | Turkey: Vize, toward<br>Kömürköy-Alkpınar                                         | <i>SALA</i><br><i>149333</i> | B. M. Rojas-Andres et<br>al.      | KT361707 |
| 139              | <i>V. turrilliana</i> 2                          | Bulgaria: 15 km north of<br>Malko Turnovo, near the<br>bridge on the river Veleka | <i>SALA</i><br><i>149334</i> | B. M. Rojas-Andres et<br>al.      | KT361708 |
| 140              | <i>V. turrilliana</i> 3                          | Turkey: Istanbul                                                                  | <i>WU</i><br><i>0023358</i>  | D. C. Albach 278                  | AF486360 |
| 141              | <i>V. vendetta-deae</i>                          | Georgia: Kazbegi                                                                  | <i>WU</i> 327                | D. C. Albach                      | AF486361 |
| <i>Outgroups</i> |                                                  |                                                                                   |                              |                                   |          |
| 142              | <i>V. chamaedrys</i>                             | RBG Kew                                                                           | <i>K</i>                     | M. Chase                          | AF313003 |
| 143              | <i>V. polita</i>                                 | Spain: Salamanca, Ciudad<br>Rodrigo                                               | <i>SALA</i><br><i>149255</i> | J. A. Sánchez-Agudo               | KT361716 |
| 144              | <i>V. campylopoda</i>                            | Jordan: near Ruin Shorbek                                                         | <i>WU</i> 4152               | P. Schonswetter and<br>A. Tribsch | AF486364 |
